# Supplementary material for: Optimization in Construction Management Using Adaptive Opposition Slime Mould Algorithm
Source: Hindawi journal article supplement (doi:10.1155/2023/7228896), 2023-04-22
Supplement: f1 [file 7228896.f1.docx]

**Supplementary Material**

**A fuzzy-MATLAB model for Activity Safety Risk (ASR) determination**

A safety item's safety risk is calculated using two input parameters, namely risk likelihood (RL) and risk severity (RS), as shown in figure 1. Language phrases like very low, low, medium, high, and very high can be used to elicit information from the project team about RL and RS. Despite the fact that any membership function may be utilized, the triangle membership function is used in this paper. In table S1, each linguistic phrase is assigned a triangle fuzzy number and a crisp grade. A risk matrix is used in the case study project to demonstrate the fuzzy rule base for fuzzy based safety risk assessment (table S2). From project to project, this risk matrix could change.

**Table S1. Linguistic definition for risk probability and risk severity**

| **Linguistic Term** | **Triangular Fuzzy Numbers** |
| --- | --- |
| VL | (0,0,1.25) |
| L | (0,1.25,2.5) |
| M | (1.25,2.5,3.75) |
| H | (2.5,3.75,5) |
| VH | (3.75,5,0) |


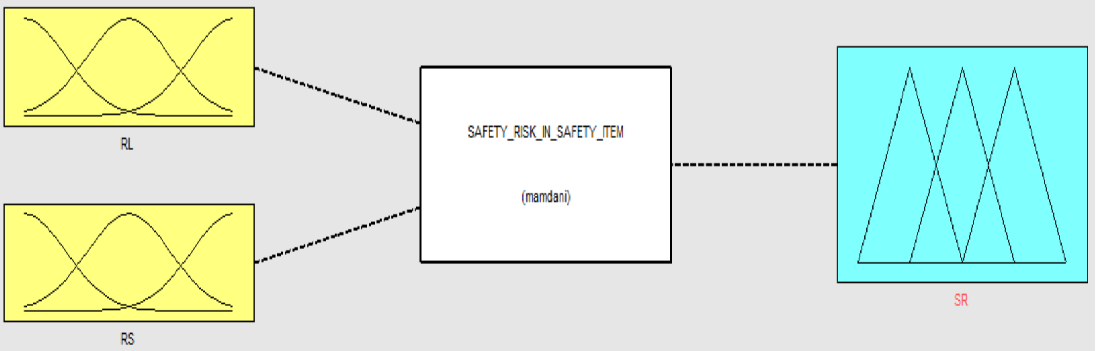


**Figure 1. Fuzzy-MATLAB model for safety risk determination safety item**

**Table S2. Fuzzy Rule Base (Risk Matrix)**

| **ASR** | **RS** | | | | | |
| --- | --- | --- | --- | --- | --- | --- |
| **RL** |  | VL | L | M | H | VH |
| VL | VL | VL | L | M | H |
| L | VL | L | M | M | H |
| M | VL | L | M | M | VH |
| H | VL | L | M | H | VH |
| VH | VL | M | H | VH | VH |

Sample fuzzy rules:

1. If RP is L and RS is M then SR is M.

2. If RP is H and RS is L then SR is L.

The fuzzy-MATLAB model depicted in figure 1 is used to calculate the risks of equipment failure, labor injury, and material waste for each execution mode. After adding up the three safety risks in the activity's mode of execution, activity safety risk (ASR) is calculated. With the following equation, PSR can be calculated: PSR =

Where, ASRA is activity safety risk of activity *A.*
